# Supplementary material for: GJA1 depletion causes ciliary defects by affecting Rab11 trafficking to the ciliary base
Source: eLife. 2022 Aug 25;11:e81016. doi: 10.7554/eLife.81016 (PMC9448326; doi:10.7554/eLife.81016)
Supplement: Figure 2—figure supplement 1—source data 1. [file elife-81016-fig2-figsupp1-data1.xlsx]

## Sheet: Sheet1
Figure 2-figure supplement 1. Dominant-negative GJA1 mutants cause ciliary defects and exhibit differential localization.
C. The average lengths of ciliary axonemes.
Technical replicates	Biological replicates	CTL	T154A	del 130-136	del 234-243		Statistics	The ordinary one-way ANOVA
1	1	20.19	23.62	17.98	16.23		Dunnett's multiple comparisons test	Mean Diff.	95.00% CI of diff.	Below threshold?	Summary	Adjusted P Value	A-?
	2	20.98	16.32	17.77	14.39		CTL vs. T154A	3.303	1.230 to 5.376	Yes	***	0.0008	B	T154A
	3	17.13	20.29	18.76	17.76		CTL vs. Δ130-136	4.416	2.343 to 6.489	Yes	****	<0.0001	C	Δ130-136
	4	23.74	18.11	19.4	16.23		CTL vs. Δ234-243	4.166	2.093 to 6.238	Yes	****	<0.0001	D	Δ234-243
	5	19.28	17.77	14.15	17.31
	6	18.08	20.29	17.94	15.69		Test details	Mean 1	Mean 2	Mean Diff.	SE of diff.	n1	n2	q	DF
	7	23.03	18.28	16.47	13.52		CTL vs. T154A	20.14	16.83	3.303	0.8646	20	20	3.82	76
	8	18.48	18.78	17.51	17.49		CTL vs. Δ130-136	20.14	15.72	4.416	0.8646	20	20	5.107	76
	9	18.7	17.59	18.85	19.28		CTL vs. Δ234-243	20.14	15.97	4.166	0.8646	20	20	4.818	76
	10	15.98	16.03	10.49	20.17
2	1	22.59	12.95	18.18	17.69
	2	19.5	13.01	17.55	15.37
	3	20.3	14.55	13.43	15.5
	4	18.08	17.15	11.04	16.38
	5	26.03	14.02	17.58	11.84
	6	19.28	14.39	14.22	11.28
	7	20.1	17.31	16.19	17.45
	8	22.59	13.9	17.1	15.13
	9	16.85	18.56	11.09	17.35
	10	21.83	13.76	8.72	13.37
