# Supplementary material for: GJA1 depletion causes ciliary defects by affecting Rab11 trafficking to the ciliary base
Source: eLife. 2022 Aug 25;11:e81016. doi: 10.7554/eLife.81016 (PMC9448326; doi:10.7554/eLife.81016)
Supplement: Figure 2—source data 1. [file elife-81016-fig2-data1.xlsx]

## Sheet: Sheet1
Figure 2. GJA1 dysfunction causes ciliary defects in Xenopus multiciliated epithelial cells.
B. Statistical analysis of the number of multiciliated cells per unit area.
Technical replicates	Biological replicates	CTL	T154A	Δ130-136	Δ234-243		Statistics	The ordinary one-way ANOVA
1	1	19	7	10	13		Dunnett's multiple comparisons test	Mean Diff.	95.00% CI of diff.	Below threshold?	Summary	Adjusted P Value	A-?
	2	25	12	7	4		CTL vs. T154A	10.23	7.183 to 13.28	Yes	****	<0.0001	B	T154A
	3	26	10	8	17		CTL vs. Δ130-136	12.6	9.590 to 15.61	Yes	****	<0.0001	C	Δ130-136
	4	17	6	9	19		CTL vs. Δ234-243	8.705	5.553 to 11.86	Yes	****	<0.0001	D	Δ234-243
	5	19	13	4	11
	6	22	13	10	14		Test details	Mean 1	Mean 2	Mean Diff.	SE of diff.	n1	n2	q	DF
	7	23	27	16	11		CTL vs. T154A	22.29	12.06	10.23	1.288	28	36	7.944	129
	8	26	7	7	10		CTL vs. Δ130-136	22.29	9.684	12.6	1.273	28	38	9.9	129
	9	31	9	8	4		CTL vs. Δ234-243	22.29	13.58	8.705	1.332	28	31	6.533	129
	10	25	5	5	12
	11	27	20	11	16
	12	18	6	13	5
	13	20	2	20	17
	14		13	11	14
	15		8	2
	16		13	21
2	1	20	9	3	19
	2	16	12	4	17
	3	23	9	12	13
	4	19	13	13	18
	5	21	21	11	9
	6	17	19	4	21
	7	23	10	3	20
	8	29	12	12	15
	9	15	17	13	28
	10	14	19	10	17
	11	30	18	19	8
	12	31	6	7	13
	13	20	15	12	19
	14	25	14	8	8
	15	23	12	15	5
	16		9	7	8
	17		20	12	16
	18		12	9
	19		8	9
	20		8	6
	21			12
	22			5
