# Supplementary material for: GJA1 depletion causes ciliary defects by affecting Rab11 trafficking to the ciliary base
Source: eLife. 2022 Aug 25;11:e81016. doi: 10.7554/eLife.81016 (PMC9448326; doi:10.7554/eLife.81016)
Supplement: Figure 2—source data 2. [file elife-81016-fig2-data2.xlsx]

## Sheet: Sheet1
Figure 2. GJA1 dysfunction causes ciliary defects in Xenopus multiciliated epithelial cells.
D. Statistical analysis of GJA1 intensity as a ratio of that in the ciliary axoneme to that in the cytoplasm.
Technical replicates	Biological replicates	CTL	T154A	Δ130-136	Δ234-243		Statistics	The ordinary one-way ANOVA
1	1	16.5963	10.0139	7.68273	3.517		Dunnett's multiple comparisons test	Mean Diff.	95.00% CI of diff.	Below threshold?	Summary	Adjusted P Value	A-?
	2	13.8634	7.55862	5.26524	7.14828		CTL vs. T154A	9.117	4.469 to 13.77	Yes	****	<0.0001	B	T154A
	3	12.4814	3.51339	15.3925	10.7486		CTL vs. Δ130-136	6.882	0.9110 to 12.85	Yes	*	0.0194	C	Δ130-136
	4	6.55418	20.0787	11.1593	3.10106		CTL vs. Δ234-243	11.87	6.823 to 16.91	Yes	****	<0.0001	D	Δ234-243
	5	4.3469	13.2106	8.72426	7.53022
	6	39.4334	13.021		4.37126		Test details	Mean 1	Mean 2	Mean Diff.	SE of diff.	n1	n2	q	DF
	7	10.9738	4.30532		3.22883		CTL vs. T154A	18.93	9.813	9.117	1.923	23	23	4.742	69
	8	15.6356	5.79801		11.3559		CTL vs. Δ130-136	18.93	12.05	6.882	2.47	23	10	2.787	69
	9	29.7883	8.10104		2.90264		CTL vs. Δ234-243	18.93	7.065	11.87	2.085	23	17	5.69	69
	10	21.2174	20.3683
	11	9.83798	17.5331
	12	39.0175
2	1	13.6933	12.9286	7.93038	4.53858
	2	25.1998	4.88811	13.9985	4.50179
	3	36.4149	13.2877	17.3969	5.74827
	4	12.5369	11.7187	14.8835	14.7758
	5	17.9144	9.91592	18.048	8.26155
	6	18.6154	7.69219		8.97236
	7	16.6899	7.99924		11.6616
	8	13.7006	9.40326		7.7358
	9	17.1864	9.9735
	10	22.5202	2.37179
	11	21.1706	4.24778
	12		7.77337
