# Supplementary material for: GJA1 depletion causes ciliary defects by affecting Rab11 trafficking to the ciliary base
Source: eLife. 2022 Aug 25;11:e81016. doi: 10.7554/eLife.81016 (PMC9448326; doi:10.7554/eLife.81016)
Supplement: Figure 3—figure supplement 1—source data 1. [file elife-81016-fig3-figsupp1-data1.xlsx]

## Sheet: Sheet1
Figure 3-figure supplement 1. MO-mediated knockdown of GJA1 does not affect the cell fate specification of multiciliated cells.
B. Statistical analysis of DNAH9-positive cells.
Technical replicates	Biological replicates	CTL	MO		Statistics	Unpaired t test (two-tailed)
1	1	12	16		Unpaired t test
	2	15	13		P value	0.4907
	3	11	15		P value summary	ns
	4	17	13		Significantly different (P < 0.05)?	No
	5	17	15		One- or two-tailed P value?	Two-tailed
	6	13	13		t, df	t=0.6929, df=68
	7	13	20
	8	13	12		How big is the difference?
	9	18	15		Mean of column A	14.92
	10	14	14		Mean of column B	15.42
	11	15	16		Difference between means (B - A) ± SEM	0.5053 ± 0.7293
	12	13	21		95% confidence interval	-0.9499 to 1.961
	13	13	13		R squared (eta squared)	0.007011
	14	15	9
	15	14	14		Data analyzed
	16	13	15		Sample size, column A	37
	17	11			Sample size, column B	33
	18	10
	19	13
2	1	12	11
	2	15	13
	3	12	15
	4	21	18
	5	15	20
	6	20	20
	7	13	19
	8	17	20
	9	19	12
	10	10	19
	11	24	16
	12	18	15
	13	17	14
	14	17	16
	15	15	17
	16	15	15
	17	13	15
	18	19
