# Supplementary material for: GJA1 depletion causes ciliary defects by affecting Rab11 trafficking to the ciliary base
Source: eLife. 2022 Aug 25;11:e81016. doi: 10.7554/eLife.81016 (PMC9448326; doi:10.7554/eLife.81016)
Supplement: Figure 3—figure supplement 2—source data 1. [file elife-81016-fig3-figsupp2-data1.xlsx]

## Sheet: Sheet1
Figure 3-figure supplement 2. CRISPR/Cas9-mediated GJA1 knockout shows ciliary defect phenotypes similar to MO-mediated knockdown.
D. Statistical analysis of the number of multiciliated cells per unit area.
Technical replicates	Biological replicates	CTL	CRISPR/Cas9 CTL	GJA1-CRISPR/Cas9		Statistics	The ordinary one-way ANOVA
1	1	21	22	16		Tukey's multiple comparisons test	Mean Diff.	95.00% CI of diff.	Below threshold?	Summary	Adjusted P Value
	2	19	28	13		CTL vs. CRISPR CTL	2.1	-1.095 to 5.295	No	ns	0.2626	A-B
	3	25	17	10		CTL vs. GJA1-CRISPR/Cas9	9.3	6.988 to 11.61	Yes	****	<0.0001	A-C
	4	27	21	23		CRISPR CTL vs. GJA1-CRISPR/Cas9	7.2	4.242 to 10.16	Yes	****	<0.0001	B-C
	5	24	21	4
	6	17	16	14		Test details	Mean 1	Mean 2	Mean Diff.	SE of diff.	n1	n2	q	DF
	7	22	18	13		CTL vs. CRISPR CTL	21.9	19.8	2.1	1.331	20	10	2.232	62
	8	25	14	6		CTL vs. GJA1-CRISPR/Cas9	21.9	12.6	9.3	0.963	20	35	13.66	62
	9	23	20	9		CRISPR CTL vs. GJA1-CRISPR/Cas9	19.8	12.6	7.2	1.232	10	35	8.266	62
	10	21	21	15
	11			15
	12			12
	13			12
	14			11
	15			19
2	1	23		18
	2	21		11
	3	21		13
	4	22		12
	5	23		14
	6	21		13
	7	18		15
	8	22		9
	9	23		12
	10	20		11
	11			13
	12			10
	13			13
	14			17
	15			6
	16			9
	17			11
	18			18
	19			12
	20			12
