# Supplementary material for: GJA1 depletion causes ciliary defects by affecting Rab11 trafficking to the ciliary base
Source: eLife. 2022 Aug 25;11:e81016. doi: 10.7554/eLife.81016 (PMC9448326; doi:10.7554/eLife.81016)
Supplement: Figure 3—source data 1. [file elife-81016-fig3-data1.xlsx]

## Sheet: Sheet1
Figure 3. Morpholino-mediated knockdown of GJA1 causes severe disruption of ciliogenesis in Xenopus multiciliated epithelial cells.
E. Statistical analysis of the number of multiciliated cells per unit area.
Technical replicates	Biological replicates	CTL	MO	Rescue (WT)	Rescue (T154A)	Rescue (Δ130-136)	Rescue (Δ234-243)		Statistics	The ordinary one-way ANOVA
1	1	22	17	13	6	15	6		Dunnett's multiple comparisons test	Mean Diff.	95.00% CI of diff.	Below threshold?	Summary	Adjusted P Value	B-?
	2	18	10	16	5	8	8		MO vs. CTL	-9.577	-12.10 to -7.054	Yes	****	<0.0001	A	CTL
	3	19	12	15	3	9	10		MO vs. Rescue (WT)	-5.951	-8.628 to -3.274	Yes	****	<0.0001	C	Rescue (WT)
	4	19	9	12	12	13	11		MO vs. Rescue (T154A)	0.87	-1.619 to 3.358	No	ns	0.8434	D	Rescue (T154A)
	5	21	7	12	10	12	11		MO vs. Rescue (Δ130-136)	0.1531	-2.352 to 2.658	No	ns	0.9998	E	Rescue (Δ130-136)
	6	25	5	16	5	6	11		MO vs. Rescue (Δ234-243)	1.332	-1.470 to 4.134	No	ns	0.6275	F	Rescue (Δ234-243)
	7	15	6	16	17	6	10
	8	20	12	12	13	10	10		Test details	Mean 1	Mean 2	Mean Diff.	SE of diff.	n1	n2	q	DF
	9	18	8	14	1	12	14		MO vs. CTL	10.24	19.82	-9.577	0.9952	29	33	9.623	173
	10	23	10	22	5	10	13		MO vs. Rescue (WT)	10.24	16.19	-5.951	1.056	29	26	5.635	173
	11	25	20	12	8	10			MO vs. Rescue (T154A)	10.24	9.371	0.87	0.9819	29	35	0.886	173
	12	15	13	15	5	13			MO vs. Rescue (Δ130-136)	10.24	10.09	0.1531	0.9884	29	34	0.1549	173
	13	20	6	13	13	11			MO vs. Rescue (Δ234-243)	10.24	8.909	1.332	1.106	29	22	1.205	173
	14	17	2	19	14	9
	15	13	12		9	8
	16	23	14		6	9
	17	17				9
	18					11
2	1	19	12	29	8	15	11
	2	22	11	16	16	8	5
	3	25	7	13	8	11	10
	4	18	17	11	9	2	5
	5	27	11	20	9	9	6
	6	20	8	8	12	7	4
	7	12	17	23	5	12	11
	8	21	8	21	19	11	5
	9	16	8	16	10	15	7
	10	26	10	18	5	16	9
	11	13	9	20	12	13	12
	12	22	12	19	18	8	7
	13	18	4		7	10
	14	16			13	9
	15	29			10	10
	16	20			9	6
	17				9
	18				7
	19				10
