# Supplementary material for: GJA1 depletion causes ciliary defects by affecting Rab11 trafficking to the ciliary base
Source: eLife. 2022 Aug 25;11:e81016. doi: 10.7554/eLife.81016 (PMC9448326; doi:10.7554/eLife.81016)
Supplement: Figure 4—source data 1. [file elife-81016-fig4-data1.xlsx]

## Sheet: Sheet1
Figure 4. GJA1 depletion disrupts GRP cilia formation and left-right asymmetry.
B. The average lengths of GRP ciliary axonemes.
Technical replicates	Biological replicates	CTL	MO			Statistics	Unpaired t test (two-tailed)
1	1	4.714	4.53367			Unpaired t test
	2	5.849	4.16167			P value	<0.0001
	3	6.38533	2.82833			P value summary	****
	4	5.233	2.98133			Significantly different (P < 0.05)?	Yes
	5	5.88633	2.82833			One- or two-tailed P value?	Two-tailed
	6	6.933	2.82833			t, df	t=14.89, df=198
	7	7.644	2.60933
	8	6.59967	3.55233			How big is the difference?
	9	8.52267	3.07333			Mean of column A	6.122
	10	5.20667	2.40367			Mean of column B	3.954
	11	4.74767	2			Difference between means (B - A) ± SEM	-2.168 ± 0.1456
	12	7.31067	4.77267			95% confidence interval	-2.455 to -1.881
	13	5.89733	4.346			R squared (eta squared)	0.5281
	14	6.74167	4.63067
	15	7.28	4.02767			Data analyzed
	16	6.58567	2.66667			Sample size, column A	100
	17	6.832	3.90167			Sample size, column B	100
	18	5.467	5.70567
	19	5.51767	6.68233
	20	8.629	3.59
	21	4.48467	3.35
	22	6.14633	2.68733
	23	4.92167	4.49133
	24	7.11167	6.59967
	25	6.872	6.014
	26	7.07167	4.53367
	27	6.16533	4.714
	28	6.77633	3.39933
	29	6.87667	4.014
	30	5.07733	5.467
	31	7.87667	6.86367
	32	5.848	5.27033
	33	6.12833	5.67633
2	1	5.82133	4.95533
	2	3.86867	5.33033
	3	5.86867	3.92933
	4	5.20667	3.59
	5	7.60133	3.81333
	6	5.354	4.05533
	7	6.26267	4.42667
	8	5.04433	6.014
	9	5	2.42667
	10	6.22067	4.63067
	11	5.93467	4.17667
	12	5.64233	3.59
	13	4.77267	4.303
	14	5.82133	4.39333
	15	6.61633	2.98133
	16	5.67633	2.40367
	17	5.66667	3.14467
	18	6.00933	3
	19	6.867	4.276
	20	6.566	4.05533
	21	5.66667	2.40367
	22	5.963	3.59
	23	7.23467	3.16233
	24	5.375	2.33333
	25	5.07733	4.97667
	26	7.13367	3.72667
	27	5.34367	3.54333
	28	5.385	2.824
	29	5.82133	2.357
	30	6.403	4.46167
	31	5.96267	4.53367
	32	6.89733	2.49067
	33	5.54767	4.17667
3	1	7.33333	2.13433
	2	6.57467	3.283
	3	6.31833	6.11933
	4	6.33333	4.26867
	5	7.56067	4.26867
	6	6.56133	4.12167
	7	6.16133	3.59
	8	5.696	3.33333
	9	6.02067	3.66667
	10	7.13367	4.836
	11	6.67867	4.33333
	12	5.226	4.84433
	13	7.51633	3.54333
	14	5.68733	4.17667
	15	6.68433	6.38567
	16	5.27033	3.72667
	17	7.31067	4.21633
	18	6.41167	4.33333
	19	5.735	3.90167
	20	6.66667	3.69433
	21	6.00933	4.57167
	22	4.872	5.04433
	23	5.66667	4.80733
	24	7.31067	3.35
	25	6.472	3.07333
	26	5.42633	4.67867
	27	6.742	4.48467
	28	3.60567	5.099
	29	7.22633	2.33333
	30	5.824	2.10833
	31	4.33333	2.72067
	32	5.385	2.69267
	33	5.831	4.472
	34	5.66667	1.94267
