# Supplementary material for: GJA1 depletion causes ciliary defects by affecting Rab11 trafficking to the ciliary base
Source: eLife. 2022 Aug 25;11:e81016. doi: 10.7554/eLife.81016 (PMC9448326; doi:10.7554/eLife.81016)
Supplement: Figure 4—source data 2. [file elife-81016-fig4-data2.xlsx]

## Sheet: Sheet1
Figure 4. GJA1 depletion disrupts GRP cilia formation and left-right asymmetry.
D. GJA1 depletion reversed heart looping in Xenopus embryos.
Technical replicates		CTL	MO
1	Normal	30	10
	Reverse	0	4
2	Normal	25	11
	Reverse	0	6
3	Normal	42	18
	Reverse	0	7
