# Supplementary material for: GJA1 depletion causes ciliary defects by affecting Rab11 trafficking to the ciliary base
Source: eLife. 2022 Aug 25;11:e81016. doi: 10.7554/eLife.81016 (PMC9448326; doi:10.7554/eLife.81016)
Supplement: Figure 4—source data 3. [file elife-81016-fig4-data3.xlsx]

## Sheet: Sheet1
Figure 4. GJA1 depletion disrupts GRP cilia formation and left-right asymmetry.
F. Expression of the left LPM-specific marker PITX2 was disrupted in GJA1 morphants.
Technical replicates		WT	MO
1	Left	26	13
	Absent	0	4
	Bilateral	0	1
2	Left	35	30
	Absent	0	4
	Bilateral	0	1
3	Left	35	26
	Absent	0	4
	Bilateral	0	4
