# Supplementary material for: GJA1 depletion causes ciliary defects by affecting Rab11 trafficking to the ciliary base
Source: eLife. 2022 Aug 25;11:e81016. doi: 10.7554/eLife.81016 (PMC9448326; doi:10.7554/eLife.81016)
Supplement: Figure 5—figure supplement 1—source data 1. [file elife-81016-fig5-figsupp1-data1.xlsx]

## Sheet: Sheet1
Figure 5-figure supplement 1. Ciliation of RPE1 cells by serum starvation and the efficacy of GJA1 siRNA.
B. The percentage of ciliated cells.
Technical replicates	Biological replicates	WT(-Serum)	WT(+Serum)				Statistics	Unpaired t test (two-tailed)
1	1	60.6742	1.6129				Unpaired t test
2	1	64.0625	0				P value	0.0009
							P value summary	***
							Significantly different (P < 0.05)?	Yes
							One- or two-tailed P value?	Two-tailed
							t, df	t=32.81, df=2
							How big is the difference?
							Mean of column A	62.37
							Mean of column B	0.8065
							Difference between means (B - A) ± SEM	-61.56 ± 1.876
Cell count #		WT(-Serum)		WT(+Serum)			95% confidence interval	-69.64 to -53.49
Technical replicates	Biological replicates	cilium	non-cilium	cilium	non-cilium		R squared (eta squared)	0.9981
1	1	54	35	1	61
2	1	41	23	0	63		Data analyzed
							Sample size, column A	2
							Sample size, column B	2
