# Supplementary material for: GJA1 depletion causes ciliary defects by affecting Rab11 trafficking to the ciliary base
Source: eLife. 2022 Aug 25;11:e81016. doi: 10.7554/eLife.81016 (PMC9448326; doi:10.7554/eLife.81016)
Supplement: Figure 5—source data 1. [file elife-81016-fig5-data1.xlsx]

## Sheet: Sheet1
Figure 5. siRNA-mediated knockdown of GJA1 disrupts primary cilia formation in human RPE1 cells.
B. Statistical analysis of the percentage of ciliated cells.
Technical replicates	Biological replicates	WT	siRNA	Rescue		Statistics	The ordinary one-way ANOVA
1	1	58	6.45161	16.6667		Dunnett's multiple comparisons test	Mean Diff.	95.00% CI of diff.	Below threshold?	Summary	Adjusted P Value
	2	56.1403	24.2424	47.3684		siRNA vs. WT	-49.52	-59.71 to -39.33	Yes	****	<0.0001
	3	69.3878	19.0476	28		siRNA vs. Rescue	-11.69	-21.88 to -1.506	Yes	*	0.0238
	4	52.459	9.09091	24
2	1	60.6742	11.5385	21.4286		Test details	Mean 1	Mean 2	Mean Diff.	SE of diff.	n1
	2	64.0625	11.3636	25.9259		siRNA vs. WT	14.73	64.25	-49.52	4.298	8
	3	76	11.1111	20		siRNA vs. Rescue	14.73	26.42	-11.69	4.298	8
	4	77.2727	25	28
Cell count #		WT		siRNA		Rescue
Technical replicates	Biological replicates	cilium	non-cilium	cilium	non-cilium	cilium	non-cilium
1	1	29	21	2	29	4	20
	2	32	25	8	25	9	10
	3	34	15	4	17	7	18
	4	32	29	4	40	6	19
2	1	54	35	6	46	6	22
	2	41	23	5	39	7	20
	3	19	6	1	8	4	16
	4	17	5	2	6	7	18
