# Supplementary material for: GJA1 depletion causes ciliary defects by affecting Rab11 trafficking to the ciliary base
Source: eLife. 2022 Aug 25;11:e81016. doi: 10.7554/eLife.81016 (PMC9448326; doi:10.7554/eLife.81016)
Supplement: Figure 6—figure supplement 2—source data 1. [file elife-81016-fig6-figsupp2-data1.xlsx]

## Sheet: Sheet1
Figure 6-figure supplement 2. CP110 localization in multiciliated cells in GJA1-MO-injected Xenopus embryos.
B. The relative intensity of CP110 signals in the ciliated cells.
Technical replicates	Biological replicates	CTL	MO		Statistics	Unpaired t test (two-tailed)
1	1	2.78242	2.70721		Unpaired t test
	2	3.07167	4.38228		P value	<0.0001
	3	2.96672	4.45526		P value summary	****
	4	3.69881	5.50825		Significantly different (P < 0.05)?	Yes
	5	2.63396	4.7298		One- or two-tailed P value?	Two-tailed
	6	3.31997	4.39965		t, df	t=8.556, df=44
	7	3.46587	5.57776
	8	3.09215	6.6099		How big is the difference?
	9	2.72867	6.44546		Mean of column A	2.992
	10	3.02816	7.71445		Mean of column B	5.076
	11	3.21758	5.39425		Difference between means (B - A) ± SEM	2.084 ± 0.2435
	12	3.5273	4.743		95% confidence interval	1.593 to 2.574
	13	1.90956	5.57643		R squared (eta squared)	0.6246
	14	2.73891	4.30744
	15	2.9744	4.75766		Data analyzed
	16	2.84093	5.87588		Sample size, column A	27
	17	2.93955	5.17228		Sample size, column B	19
	18	2.60233	3.13687
	19	3.41357	4.95241
	20	2.65323
	21	2.76776
	22	3.31495
	23	3.57582
	24	3.71262
	25	2.99682
	26	2.32238
	27	2.50053
