# Supplementary material for: GJA1 depletion causes ciliary defects by affecting Rab11 trafficking to the ciliary base
Source: eLife. 2022 Aug 25;11:e81016. doi: 10.7554/eLife.81016 (PMC9448326; doi:10.7554/eLife.81016)
Supplement: Figure 6—source data 1. [file elife-81016-fig6-data1.xlsx]

## Sheet: Sheet1
Figure 6. Knockdown of GJA1 results in the abnormal distribution of PCM proteins involved in ciliogenesis.
B. The percentage of CP110 dots per cell.
Technical replicates	Biological replicates		WT	siRNA		Statistics	2way ANOVA
1	1	1 Dot	100	14.29		Šídák's multiple comparisons test	Mean Diff.	95.00% CI of diff.	Below threshold?	Summary	Adjusted P Value
2	1		100	0		CTL - siRNA
1	1	2 Dots	0	85.71		1 Dot	92.86	67.98 to 117.7	Yes	***	0.0004
2	1		0	100		2 Dots	-92.86	-117.7 to -67.98	Yes	***	0.0004
						Test details	Mean 1	Mean 2	Mean Diff.	SE of diff.	N1	N2	t	DF
						CTL - siRNA
						1 Dot	100	7.145	92.86	7.145	2	2	13	4
						2 Dots	0	92.86	-92.86	7.145	2	2	13	4
Cell count #
Technical replicates	Biological replicates		WT	siRNA
1	1	1 Dot	11	2
2	1		13	0
1	1	2 Dots	0	12
2	1		0	8
