# Supplementary material for: GJA1 depletion causes ciliary defects by affecting Rab11 trafficking to the ciliary base
Source: eLife. 2022 Aug 25;11:e81016. doi: 10.7554/eLife.81016 (PMC9448326; doi:10.7554/eLife.81016)
Supplement: Figure 7—figure supplement 2—source data 1. [file elife-81016-fig7-figsupp2-data1.xlsx]

## Sheet: Sheet1
Figure 7-figure supplement 2. Basal Ca2+ levels and Ca2+ influx in GJA1-depleted RPE1 cells.
A. Basal Ca2+ levels in RPE1.
Technical replicates	Time point	CTL	siRNA	Overexpression		Statistics	Ordinary one-way ANOVA
1	1	0.197609	0.207444	0.205309		Dunnett's multiple comparisons test	Mean Diff.	95.00% CI of diff.	Below threshold?	Summary	Adjusted P Value	A-?
	2	0.202074	0.2068	0.200949		CTL vs. siRNA	-0.0005979	-0.004501 to 0.003305	No	ns	0.9136	B	siRNA
	3	0.201178	0.203589	0.205195		CTL vs. Overexpression	0.001389	-0.002514 to 0.005291	No	ns	0.6283	C	Overexpression
	4	0.19765	0.203372	0.200477
	5	0.202908	0.202684	0.203912		Test details	Mean 1	Mean 2	Mean Diff.	SE of diff.	n1	n2	q	DF
	6	0.202251	0.198409	0.196433		CTL vs. siRNA	0.1992	0.1998	-0.0005979	0.001695	13	13	0.3527	36
	7	0.196508	0.19914	0.200389		CTL vs. Overexpression	0.1992	0.1979	0.001389	0.001695	13	13	0.8192	36
	8	0.199839	0.199604	0.193704
	9	0.198616	0.198669	0.195562
	10	0.197831	0.199247	0.192623
	11	0.199551	0.195169	0.19484
	12	0.195237	0.192523	0.191432
	13	0.198961	0.191336	0.191335
