# Supplementary material for: GJA1 depletion causes ciliary defects by affecting Rab11 trafficking to the ciliary base
Source: eLife. 2022 Aug 25;11:e81016. doi: 10.7554/eLife.81016 (PMC9448326; doi:10.7554/eLife.81016)
Supplement: Figure 7—figure supplement 2—source data 2. [file elife-81016-fig7-figsupp2-data2.xlsx]

## Sheet: Sheet1
Figure 7-figure supplement 2. Basal Ca2+ levels and Ca2+ influx in GJA1-depleted RPE1 cells.
B. Ca2+ influx in RPE1.
Technical replicates	Time point	CTL	siRNA	Overexpression		Statistics	Ordinary one-way ANOVA
1	-1	0.144501	0.131369	0.165489		Dunnett's multiple comparisons test	Mean Diff.	95.00% CI of diff.	Below threshold?	Summary	Adjusted P Value	A-?
	0 (Peak)	0.145987	0.134407	0.170644		CTL vs. siRNA	0.01477	0.005306 to 0.02423	Yes	**	0.0076	B	siRNA
	1	0.144404	0.124808	0.160788		CTL vs. Overexpression	-0.02068	-0.03014 to -0.01121	Yes	**	0.0014	C	Overexpression
						Test details	Mean 1	Mean 2	Mean Diff.	SE of diff.	n1	n2	q	DF
						CTL vs. siRNA	0.145	0.1302	0.01477	0.003305	3	3	4.469	6
						CTL vs. Overexpression	0.145	0.1656	-0.02068	0.003305	3	3	6.256	6
