# Supplementary material for: GJA1 depletion causes ciliary defects by affecting Rab11 trafficking to the ciliary base
Source: eLife. 2022 Aug 25;11:e81016. doi: 10.7554/eLife.81016 (PMC9448326; doi:10.7554/eLife.81016)
Supplement: Figure 7—source data 1. [file elife-81016-fig7-data1.xlsx]

## Sheet: Sheet1
Figure 7. Knockdown of GJA1 disrupted Rab11 trafficking to the ciliary base.
D. Statistical analysis of Rab11 accumulation.
Technical replicates	Biological replicates	WT	siRNA	Rescue		Statistics	The ordinary one-way ANOVA
1	1	82	38.24	64.29		Dunnett's multiple comparisons test	Mean Diff.	95.00% CI of diff.	Below threshold?	Summary	Adjusted P Value	B-?
	2	66.07	46.88	76.19		siRNA vs. WT	-29.24	-44.47 to -14.01	Yes	***	0.0008	A	WT
2	1	58	52.17	53.57		siRNA vs. Rescue	-20.09	-35.32 to -4.861	Yes	*	0.0117	C	Rescue
	2	78.95	44	51.61
3	1	70.37	27.91	64		Test details	Mean 1	Mean 2	Mean Diff.	SE of diff.	n1	n2	q	DF
						siRNA vs. WT	41.84	71.08	-29.24	6.086	5	5	4.804	12
						siRNA vs. Rescue	41.84	61.93	-20.09	6.086	5	5	3.301	12
Cell count #		WT		siRNA		Rescue
Technical replicates	Biological replicates	Accumulated	Non-accumulated	Accumulated	Non-accumulated	Accumulated	Non-accumulated
1	1	41	9	13	21	18	10
	2	37	19	15	17	16	5
2	1	29	21	12	11	15	13
	2	30	8	11	14	16	15
3	1	19	8	12	31	16	9
