# Supplementary material for: GJA1 depletion causes ciliary defects by affecting Rab11 trafficking to the ciliary base
Source: eLife. 2022 Aug 25;11:e81016. doi: 10.7554/eLife.81016 (PMC9448326; doi:10.7554/eLife.81016)
Supplement: Figure 8—source data 1. [file elife-81016-fig8-data1.xlsx]

## Sheet: Sheet1
Figure 8. Dominant-negative mutant proteins of Xenopus laevis GJA1 fail to bind to Rab11.
B. Statistical analysis of the relative Rab11a-HA binding affinity.
Technical replicates	Biological replicates	wt	T154A	Δ130-136	Δ234-243		Statistics	Ordinary one-way ANOVA
1	1	1	0.202131	0.148003	0.143887		Dunnett's multiple comparisons test	Mean Diff.	95.00% CI of diff.	Below threshold?	Summary	Adjusted P Value	A-?
2	2	1	0.603191	0.581831	0.37966		wt vs. T154A	0.6155	0.2240 to 1.007	Yes	**	0.005	B	T154A
3	3	1	0.348131	0.427772	0.411145		wt vs. Δ130-136	0.6141	0.2226 to 1.006	Yes	**	0.005	C	Δ130-136
							wt vs. Δ234-243	0.6884	0.2969 to 1.080	Yes	**	0.0025	D	Δ234-243
							Test details	Mean 1	Mean 2	Mean Diff.	SE of diff.	n1	n2	q	DF
							wt vs. T154A	1	0.3845	0.6155	0.136	3	3	4.527	8
							wt vs. Δ130-136	1	0.3859	0.6141	0.136	3	3	4.517	8
							wt vs. Δ234-243	1	0.3116	0.6884	0.136	3	3	5.064	8
