# Supplementary material for: GJA1 depletion causes ciliary defects by affecting Rab11 trafficking to the ciliary base
Source: eLife. 2022 Aug 25;11:e81016. doi: 10.7554/eLife.81016 (PMC9448326; doi:10.7554/eLife.81016)
Supplement: Supplementary file 1. — Ciliogenesis genes (bold) and Ca2+ transport genes (italics) are indicated. [file elife-81016-supp1.xlsx]

## Sheet: Sheet1
Supplementary file 1 GJA1 IP-MS results
Ciliogenesis genes (bold) and Ca2+ transport genes (italics) are indicated.
Alternate ID	Identified information
TUBB2A	Tubulin beta-2A chain OS=Homo sapiens GN=TUBB2A PE=1 SV=1
GJA1	Gap junction alpha-1 protein OS=Homo sapiens GN=GJA1 PE=1 SV=2
TRIM21	E3 ubiquitin-protein ligase TRIM21 OS=Homo sapiens GN=TRIM21 PE=1 SV=1
SPTAN1	Isoform 2 of Spectrin alpha chain, non-erythrocytic 1 OS=Homo sapiens GN=SPTAN1
MYOF	Myoferlin OS=Homo sapiens GN=MYOF PE=1 SV=1
MPRIP	Isoform 2 of Myosin phosphatase Rho-interacting protein OS=Homo sapiens GN=MPRIP
IGF2R	Cation-independent mannose-6-phosphate receptor OS=Homo sapiens GN=IGF2R PE=1 SV=3
MYH13	Myosin-13 OS=Homo sapiens GN=MYH13 PE=2 SV=2
ELP4	Isoform 3 of Elongator complex protein 4 OS=Homo sapiens GN=ELP4
RPN1	Dolichyl-diphosphooligosaccharide--protein glycosyltransferase subunit 1 OS=Homo sapiens GN=RPN1 PE=1 SV=1
ALCAM	CD166 antigen OS=Homo sapiens GN=ALCAM PE=1 SV=2
ALB	Isoform 2 of Serum albumin OS=Homo sapiens GN=ALB
CK	(X98614) cytokeratin [Homo sapiens]
ALB	Isoform 3 of Serum albumin OS=Homo sapiens GN=ALB
ATP1A1	Sodium/potassium-transporting ATPase subunit alpha-1 OS=Homo sapiens GN=ATP1A1 PE=1 SV=1
ITGA3	Integrin alpha-3 OS=Homo sapiens GN=ITGA3 PE=1 SV=5
ITGAV	Integrin alpha-V OS=Homo sapiens GN=ITGAV PE=1 SV=2
NPM1	Isoform 2 of Nucleophosmin OS=Homo sapiens GN=NPM1
KRT15	Isoform 2 of Keratin, type I cytoskeletal 15 OS=Homo sapiens GN=KRT15
ITGB5	Integrin beta-5 OS=Homo sapiens GN=ITGB5 PE=1 SV=1
RAB1B	Ras-related protein Rab-1B OS=Homo sapiens GN=RAB1B PE=1 SV=1
SURF4	Surfeit locus protein 4 OS=Homo sapiens GN=SURF4 PE=1 SV=3
PPP1R18	Phostensin OS=Homo sapiens GN=PPP1R18 PE=1 SV=1
RPN2	Dolichyl-diphosphooligosaccharide--protein glycosyltransferase subunit 2 OS=Homo sapiens GN=RPN2 PE=1 SV=3
ELP5	Elongator complex protein 5 OS=Homo sapiens GN=ELP5 PE=1 SV=2
ELP6	Elongator complex protein 6 OS=Homo sapiens GN=ELP6 PE=1 SV=1
ARL6IP5	PRA1 family protein 3 OS=Homo sapiens GN=ARL6IP5 PE=1 SV=1
DYNC1I2	Isoform 2B of Cytoplasmic dynein 1 intermediate chain 2 OS=Homo sapiens GN=DYNC1I2
TMED9	Transmembrane emp24 domain-containing protein 9 OS=Homo sapiens GN=TMED9 PE=1 SV=2
SCFD1	Sec1 family domain-containing protein 1 OS=Homo sapiens GN=SCFD1 PE=1 SV=4
ATL3	Atlastin-3 OS=Homo sapiens GN=ATL3 PE=1 SV=1
XPO1	Exportin-1 OS=Homo sapiens GN=XPO1 PE=1 SV=1
TFRC	Transferrin receptor protein 1 OS=Homo sapiens GN=TFRC PE=1 SV=2
TXLNA	Alpha-taxilin OS=Homo sapiens GN=TXLNA PE=1 SV=3
RAB7A	Ras-related protein Rab-7a OS=Homo sapiens GN=RAB7A PE=1 SV=1
DDOST	Dolichyl-diphosphooligosaccharide--protein glycosyltransferase 48 kDa subunit OS=Homo sapiens GN=DDOST PE=1 SV=4
CAMK2D	Isoform Delta 3 of Calcium/calmodulin-dependent protein kinase type II subunit delta OS=Homo sapiens GN=CAMK2D
RHOA	Transforming protein RhoA OS=Homo sapiens GN=RHOA PE=1 SV=1
CD44	CD44 antigen OS=Homo sapiens GN=CD44 PE=1 SV=3
LGALS3BP	Galectin-3-binding protein OS=Homo sapiens GN=LGALS3BP PE=1 SV=1
MRC2	C-type mannose receptor 2 OS=Homo sapiens GN=MRC2 PE=1 SV=2
CNN2	Calponin-2 OS=Homo sapiens GN=CNN2 PE=1 SV=4
RAB8A	Ras-related protein Rab-8A OS=Homo sapiens GN=RAB8A PE=1 SV=1
RTN3	Reticulon-3 OS=Homo sapiens GN=RTN3 PE=1 SV=2
TNPO1	Isoform 3 of Transportin-1 OS=Homo sapiens GN=TNPO1
GCN1	eIF-2-alpha kinase activator GCN1 OS=Homo sapiens GN=GCN1 PE=1 SV=6
GNS	N-acetylglucosamine-6-sulfatase OS=Homo sapiens GN=GNS PE=1 SV=3
SDHA	Succinate dehydrogenase [ubiquinone] flavoprotein subunit, mitochondrial OS=Homo sapiens GN=SDHA PE=1 SV=2
ATP2B1	Plasma membrane calcium-transporting ATPase 1 OS=Homo sapiens GN=ATP2B1 PE=1 SV=3
TMED4	Transmembrane emp24 domain-containing protein 4 OS=Homo sapiens GN=TMED4 PE=1 SV=1
SFPQ	Splicing factor, proline- and glutamine-rich OS=Homo sapiens GN=SFPQ PE=1 SV=2
LMAN2	Vesicular integral-membrane protein VIP36 OS=Homo sapiens GN=LMAN2 PE=1 SV=1
LRRFIP2	Isoform 4 of Leucine-rich repeat flightless-interacting protein 2 OS=Homo sapiens GN=LRRFIP2
PPT1	Palmitoyl-protein thioesterase 1 OS=Homo sapiens GN=PPT1 PE=1 SV=1
FUBP1	Far upstream element-binding protein 1 OS=Homo sapiens GN=FUBP1 PE=1 SV=3
RAB11A	Ras-related protein Rab-11A OS=Homo sapiens GN=RAB11A PE=1 SV=3
GLG1	Golgi apparatus protein 1 OS=Homo sapiens GN=GLG1 PE=1 SV=2
ESYT1	Isoform 2 of Extended synaptotagmin-1 OS=Homo sapiens GN=ESYT1
LMNB1	Lamin-B1 OS=Homo sapiens GN=LMNB1 PE=1 SV=2
TMED10	Transmembrane emp24 domain-containing protein 10 OS=Homo sapiens GN=TMED10 PE=1 SV=2
BAX	Isoform Sigma of Apoptosis regulator BAX OS=Homo sapiens GN=BAX
SCCPDH	Saccharopine dehydrogenase-like oxidoreductase OS=Homo sapiens GN=SCCPDH PE=1 SV=1
CD81	CD81 antigen OS=Homo sapiens GN=CD81 PE=1 SV=1
ITGA5	Integrin alpha-5 OS=Homo sapiens GN=ITGA5 PE=1 SV=2
RAB5A	Ras-related protein Rab-5A OS=Homo sapiens GN=RAB5A PE=1 SV=2
IGLL5	Immunoglobulin lambda-like polypeptide 5 OS=Homo sapiens GN=IGLL5 PE=2 SV=2
COL27A1	Collagen alpha-1(XXVII) chain OS=Homo sapiens GN=COL27A1 PE=1 SV=1
PLBD2	Putative phospholipase B-like 2 OS=Homo sapiens GN=PLBD2 PE=1 SV=2
EPHA2	Ephrin type-A receptor 2 OS=Homo sapiens GN=EPHA2 PE=1 SV=2
MAP1B	Microtubule-associated protein 1B OS=Homo sapiens GN=MAP1B PE=1 SV=2
UQCRC2	Cytochrome b-c1 complex subunit 2, mitochondrial OS=Homo sapiens GN=UQCRC2 PE=1 SV=3
SRP68	Signal recognition particle subunit SRP68 OS=Homo sapiens GN=SRP68 PE=1 SV=2
GSR	Isoform 4 of Glutathione reductase, mitochondrial OS=Homo sapiens GN=GSR
TGOLN2	Isoform 5 of Trans-Golgi network integral membrane protein 2 OS=Homo sapiens GN=TGOLN2
GIPC1	PDZ domain-containing protein GIPC1 OS=Homo sapiens GN=GIPC1 PE=1 SV=2
SERPINB3	Serpin B3 OS=Homo sapiens GN=SERPINB3 PE=1 SV=2
DBNL	Isoform 2 of Drebrin-like protein OS=Homo sapiens GN=DBNL
PCYOX1	Isoform 2 of Prenylcysteine oxidase 1 OS=Homo sapiens GN=PCYOX1
TICAM2	Isoform 2 of TIR domain-containing adapter molecule 2 OS=Homo sapiens GN=TICAM2
PIGR	Polymeric immunoglobulin receptor OS=Homo sapiens GN=PIGR PE=1 SV=4
ATP5F1	ATP synthase F(0) complex subunit B1, mitochondrial OS=Homo sapiens GN=ATP5F1 PE=1 SV=2
HACD3	Very-long-chain (3R)-3-hydroxyacyl-CoA dehydratase 3 OS=Homo sapiens GN=HACD3 PE=1 SV=2
SCARB2	Isoform 2 of Lysosome membrane protein 2 OS=Homo sapiens GN=SCARB2
PSMA4	Proteasome subunit alpha type-4 OS=Homo sapiens GN=PSMA4 PE=1 SV=1
SLC25A3	Isoform B of Phosphate carrier protein, mitochondrial OS=Homo sapiens GN=SLC25A3
HLA-A	HLA class I histocompatibility antigen, A-2 alpha chain OS=Homo sapiens GN=HLA-A PE=1 SV=1
SERPINB12	Serpin B12 OS=Homo sapiens GN=SERPINB12 PE=1 SV=1
TMEM106B	Transmembrane protein 106B OS=Homo sapiens GN=TMEM106B PE=1 SV=2
RAB2A	Ras-related protein Rab-2A OS=Homo sapiens GN=RAB2A PE=1 SV=1
AHCY	Adenosylhomocysteinase OS=Homo sapiens GN=AHCY PE=1 SV=4
PDLIM2	Isoform 5 of PDZ and LIM domain protein 2 OS=Homo sapiens GN=PDLIM2
S100A8	Protein S100-A8 OS=Homo sapiens GN=S100A8 PE=1 SV=1
EIF3F	Eukaryotic translation initiation factor 3 subunit F OS=Homo sapiens GN=EIF3F PE=1 SV=1
TBC1D15	Isoform 3 of TBC1 domain family member 15 OS=Homo sapiens GN=TBC1D15
CAV1	Caveolin-1 OS=Homo sapiens GN=CAV1 PE=1 SV=4
SCAMP1	Secretory carrier-associated membrane protein 1 OS=Homo sapiens GN=SCAMP1 PE=1 SV=2
HYOU1	Hypoxia up-regulated protein 1 OS=Homo sapiens GN=HYOU1 PE=1 SV=1
HTRA1	Serine protease HTRA1 OS=Homo sapiens GN=HTRA1 PE=1 SV=1
RPS12	40S ribosomal protein S12 OS=Homo sapiens GN=RPS12 PE=1 SV=3
PSMC5	26S protease regulatory subunit 8 OS=Homo sapiens GN=PSMC5 PE=1 SV=1
TPD52L2	Tumor protein D54 OS=Homo sapiens GN=TPD52L2 PE=1 SV=2
RDH11	Retinol dehydrogenase 11 OS=Homo sapiens GN=RDH11 PE=1 SV=2
TM9SF3	Transmembrane 9 superfamily member 3 OS=Homo sapiens GN=TM9SF3 PE=1 SV=2
PDLIM4	PDZ and LIM domain protein 4 OS=Homo sapiens GN=PDLIM4 PE=1 SV=2
GOLT1B	Vesicle transport protein GOT1B OS=Homo sapiens GN=GOLT1B PE=1 SV=1
CSN3	KAPPA CASEIN PRECURSOR. - BOS TAURUS (BOVINE).
RER1	Protein RER1 OS=Homo sapiens GN=RER1 PE=1 SV=1
ATP6V1E1	Isoform 2 of V-type proton ATPase subunit E 1 OS=Homo sapiens GN=ATP6V1E1
ADAM9	Disintegrin and metalloproteinase domain-containing protein 9 OS=Homo sapiens GN=ADAM9 PE=1 SV=1
STMN1	Stathmin OS=Homo sapiens GN=STMN1 PE=1 SV=3
CD63	Isoform 3 of CD63 antigen OS=Homo sapiens GN=CD63
MYO5A	Unconventional myosin-Va OS=Homo sapiens GN=MYO5A PE=1 SV=2
RPL31	60S ribosomal protein L31 OS=Homo sapiens GN=RPL31 PE=1 SV=1
B2M	Beta-2-microglobulin OS=Homo sapiens GN=B2M PE=1 SV=1
DYNC1H1	Cytoplasmic dynein 1 heavy chain 1 OS=Homo sapiens GN=DYNC1H1 PE=1 SV=5
ERAP1	Endoplasmic reticulum aminopeptidase 1 OS=Homo sapiens GN=ERAP1 PE=1 SV=3
GBF1	Golgi-specific brefeldin A-resistance guanine nucleotide exchange factor 1 OS=Homo sapiens GN=GBF1 PE=1 SV=2
NUP153	Nuclear pore complex protein Nup153 OS=Homo sapiens GN=NUP153 PE=1 SV=2
COL3A1	Collagen alpha-1(III) chain OS=Homo sapiens GN=COL3A1 PE=1 SV=4
PSMD4	26S proteasome non-ATPase regulatory subunit 4 OS=Homo sapiens GN=PSMD4 PE=1 SV=1
LPCAT2	Lysophosphatidylcholine acyltransferase 2 OS=Homo sapiens GN=LPCAT2 PE=1 SV=1
PSMD11	26S proteasome non-ATPase regulatory subunit 11 OS=Homo sapiens GN=PSMD11 PE=1 SV=3
PSMC3	26S protease regulatory subunit 6A OS=Homo sapiens GN=PSMC3 PE=1 SV=3
USP5	Ubiquitin carboxyl-terminal hydrolase 5 OS=Homo sapiens GN=USP5 PE=1 SV=2
PNP	Purine nucleoside phosphorylase OS=Homo sapiens GN=PNP PE=1 SV=2
USP31	Ubiquitin carboxyl-terminal hydrolase 31 OS=Homo sapiens GN=USP31 PE=2 SV=2
ATP6V1C1	V-type proton ATPase subunit C 1 OS=Homo sapiens GN=ATP6V1C1 PE=1 SV=4
MAN2B2	Epididymis-specific alpha-mannosidase OS=Homo sapiens GN=MAN2B2 PE=1 SV=4
SLC3A2	4F2 cell-surface antigen heavy chain OS=Homo sapiens GN=SLC3A2 PE=1 SV=3
RPS10	40S ribosomal protein S10 OS=Homo sapiens GN=RPS10 PE=1 SV=1
ACSL3	Long-chain-fatty-acid--CoA ligase 3 OS=Homo sapiens GN=ACSL3 PE=1 SV=3
RETSAT	All-trans-retinol 13,14-reductase OS=Homo sapiens GN=RETSAT PE=1 SV=2
SENP5	Sentrin-specific protease 5 OS=Homo sapiens GN=SENP5 PE=1 SV=3
TRAF3	TNF receptor-associated factor 3 OS=Homo sapiens GN=TRAF3 PE=1 SV=2
ATP2A2	Sarcoplasmic/endoplasmic reticulum calcium ATPase 2 OS=Homo sapiens GN=ATP2A2 PE=1 SV=1
2022-09-07	Septin-7 OS=Homo sapiens GN=SEPT7 PE=1 SV=2
HNRNPM	Heterogeneous nuclear ribonucleoprotein M OS=Homo sapiens GN=HNRNPM PE=1 SV=3
ALDH3A2	Isoform 2 of Fatty aldehyde dehydrogenase OS=Homo sapiens GN=ALDH3A2
DYNC1LI1	Cytoplasmic dynein 1 light intermediate chain 1 OS=Homo sapiens GN=DYNC1LI1 PE=1 SV=3
CSN1S2	ALPHA-S2 CASEIN PRECURSOR. - BOS TAURUS (BOVINE).
MYADM	Myeloid-associated differentiation marker OS=Homo sapiens GN=MYADM PE=1 SV=2
MOGS	Isoform 2 of Mannosyl-oligosaccharide glucosidase OS=Homo sapiens GN=MOGS
BCAP31	B-cell receptor-associated protein 31 OS=Homo sapiens GN=BCAP31 PE=1 SV=3
COMT	Catechol O-methyltransferase OS=Homo sapiens GN=COMT PE=1 SV=2
SEC31A	Protein transport protein Sec31A OS=Homo sapiens GN=SEC31A PE=1 SV=3
ADRM1	Proteasomal ubiquitin receptor ADRM1 OS=Homo sapiens GN=ADRM1 PE=1 SV=2
KRT9	ct|1082558-DECOY|S41161 keratin 9, cytoskeletal - human
EEA1	Early endosome antigen 1 OS=Homo sapiens GN=EEA1 PE=1 SV=2
SLC2A1	Solute carrier family 2, facilitated glucose transporter member 1 OS=Homo sapiens GN=SLC2A1 PE=1 SV=2
HSPH1	Heat shock protein 105 kDa OS=Homo sapiens GN=HSPH1 PE=1 SV=1
PIP	Prolactin-inducible protein OS=Homo sapiens GN=PIP PE=1 SV=1
MFGE8	Lactadherin OS=Homo sapiens GN=MFGE8 PE=1 SV=2
FASN	Fatty acid synthase OS=Homo sapiens GN=FASN PE=1 SV=3
ANKS1A	Ankyrin repeat and SAM domain-containing protein 1A OS=Homo sapiens GN=ANKS1A PE=1 SV=4
LMAN1	Protein ERGIC-53 OS=Homo sapiens GN=LMAN1 PE=1 SV=2
VDAC1	Voltage-dependent anion-selective channel protein 1 OS=Homo sapiens GN=VDAC1 PE=1 SV=2
MLEC	Malectin OS=Homo sapiens GN=MLEC PE=1 SV=1
SEL1L	Protein sel-1 homolog 1 OS=Homo sapiens GN=SEL1L PE=1 SV=3
ADAM10	Disintegrin and metalloproteinase domain-containing protein 10 OS=Homo sapiens GN=ADAM10 PE=1 SV=1
DIAPH1	Isoform 3 of Protein diaphanous homolog 1 OS=Homo sapiens GN=DIAPH1
ESYT2	Isoform 2 of Extended synaptotagmin-2 OS=Homo sapiens GN=ESYT2
NNT	NAD(P) transhydrogenase, mitochondrial OS=Homo sapiens GN=NNT PE=1 SV=3
GAS6	Growth arrest-specific protein 6 OS=Homo sapiens GN=GAS6 PE=1 SV=2
RAC1	Isoform B of Ras-related C3 botulinum toxin substrate 1 OS=Homo sapiens GN=RAC1
RPL34	60S ribosomal protein L34 OS=Homo sapiens GN=RPL34 PE=1 SV=3
CSTB	Cystatin-B OS=Homo sapiens GN=CSTB PE=1 SV=2
CTSZ	Cathepsin Z OS=Homo sapiens GN=CTSZ PE=1 SV=1
TMEM43	Transmembrane protein 43 OS=Homo sapiens GN=TMEM43 PE=1 SV=1
SH3BP4	SH3 domain-binding protein 4 OS=Homo sapiens GN=SH3BP4 PE=1 SV=1
CBR1	Carbonyl reductase [NADPH] 1 OS=Homo sapiens GN=CBR1 PE=1 SV=3
FAP	Prolyl endopeptidase FAP OS=Homo sapiens GN=FAP PE=1 SV=5
NEDD4L	E3 ubiquitin-protein ligase NEDD4-like OS=Homo sapiens GN=NEDD4L PE=1 SV=2
HIP1	Huntingtin-interacting protein 1 OS=Homo sapiens GN=HIP1 PE=1 SV=5
GPD2	Glycerol-3-phosphate dehydrogenase, mitochondrial OS=Homo sapiens GN=GPD2 PE=1 SV=3
HADHB	Trifunctional enzyme subunit beta, mitochondrial OS=Homo sapiens GN=HADHB PE=1 SV=3
PSMB6	Proteasome subunit beta type-6 OS=Homo sapiens GN=PSMB6 PE=1 SV=4
STX7	Syntaxin-7 OS=Homo sapiens GN=STX7 PE=1 SV=4
ITGA2	Integrin alpha-2 OS=Homo sapiens GN=ITGA2 PE=1 SV=1
PDLIM1	PDZ and LIM domain protein 1 OS=Homo sapiens GN=PDLIM1 PE=1 SV=4
GOLIM4	Golgi integral membrane protein 4 OS=Homo sapiens GN=GOLIM4 PE=1 SV=1
ST13	Hsc70-interacting protein OS=Homo sapiens GN=ST13 PE=1 SV=2
GPR180	Integral membrane protein GPR180 OS=Homo sapiens GN=GPR180 PE=2 SV=1
IPO7	Importin-7 OS=Homo sapiens GN=IPO7 PE=1 SV=1
FARSB	Phenylalanine--tRNA ligase beta subunit OS=Homo sapiens GN=FARSB PE=1 SV=3
IPO5	Isoform 3 of Importin-5 OS=Homo sapiens GN=IPO5
IMPAD1	Inositol monophosphatase 3 OS=Homo sapiens GN=IMPAD1 PE=1 SV=1
ETFB	Electron transfer flavoprotein subunit beta OS=Homo sapiens GN=ETFB PE=1 SV=3
BLMH	Bleomycin hydrolase OS=Homo sapiens GN=BLMH PE=1 SV=1
S100A14	Protein S100-A14 OS=Homo sapiens GN=S100A14 PE=1 SV=1
TOMM70	Mitochondrial import receptor subunit TOM70 OS=Homo sapiens GN=TOMM70 PE=1 SV=1
GLIPR1L1	sp|Q6UWM5-DECOY|GPRL1_HUMAN GLIPR1-like protein 1 OS=Homo sapiens GN=GLIPR1L1 PE=1...
DDX60	Probable ATP-dependent RNA helicase DDX60 OS=Homo sapiens GN=DDX60 PE=1 SV=3
GNAI2	Guanine nucleotide-binding protein G(i) subunit alpha-2 OS=Homo sapiens GN=GNAI2 PE=1 SV=3
SLC25A6	ADP/ATP translocase 3 OS=Homo sapiens GN=SLC25A6 PE=1 SV=4
FTL	Ferritin light chain OS=Homo sapiens GN=FTL PE=1 SV=2
JMY	Isoform 2 of Junction-mediating and -regulatory protein OS=Homo sapiens GN=JMY
ESD	S-formylglutathione hydrolase OS=Homo sapiens GN=ESD PE=1 SV=2
FAM3C	Protein FAM3C OS=Homo sapiens GN=FAM3C PE=1 SV=1
PSAP	Prosaposin OS=Homo sapiens GN=PSAP PE=1 SV=2
CYB5R3	NADH-cytochrome b5 reductase 3 OS=Homo sapiens GN=CYB5R3 PE=1 SV=3
EIF4A2	Eukaryotic initiation factor 4A-II OS=Homo sapiens GN=EIF4A2 PE=1 SV=2
CD276	CD276 antigen OS=Homo sapiens GN=CD276 PE=1 SV=1
CRNN	Cornulin OS=Homo sapiens GN=CRNN PE=1 SV=1
HLA-A	HLA class I histocompatibility antigen, A-1 alpha chain OS=Homo sapiens GN=HLA-A PE=1 SV=1
ERLIN1	Erlin-1 OS=Homo sapiens GN=ERLIN1 PE=1 SV=1
SEC11A	Signal peptidase complex catalytic subunit SEC11A OS=Homo sapiens GN=SEC11A PE=1 SV=1
ERGIC3	Endoplasmic reticulum-Golgi intermediate compartment protein 3 OS=Homo sapiens GN=ERGIC3 PE=1 SV=1
MARS	Methionine--tRNA ligase, cytoplasmic OS=Homo sapiens GN=MARS PE=1 SV=2
ACAT1	Acetyl-CoA acetyltransferase, mitochondrial OS=Homo sapiens GN=ACAT1 PE=1 SV=1
PSMD2	26S proteasome non-ATPase regulatory subunit 2 OS=Homo sapiens GN=PSMD2 PE=1 SV=3
HNRNPCL2	Heterogeneous nuclear ribonucleoprotein C-like 2 OS=Homo sapiens GN=HNRNPCL2 PE=1 SV=1
MAN2B1	Lysosomal alpha-mannosidase OS=Homo sapiens GN=MAN2B1 PE=1 SV=3
EIF3H	Eukaryotic translation initiation factor 3 subunit H OS=Homo sapiens GN=EIF3H PE=1 SV=1
DNAJB6	Isoform B of DnaJ homolog subfamily B member 6 OS=Homo sapiens GN=DNAJB6
IGKC	Ig kappa chain C region OS=Homo sapiens GN=IGKC PE=1 SV=1
LTF	Lactotransferrin OS=Homo sapiens GN=LTF PE=1 SV=6
SMPD1	Sphingomyelin phosphodiesterase OS=Homo sapiens GN=SMPD1 PE=1 SV=4
PSMB1	Proteasome subunit beta type-1 OS=Homo sapiens GN=PSMB1 PE=1 SV=2
PSMA3	Isoform 2 of Proteasome subunit alpha type-3 OS=Homo sapiens GN=PSMA3
CALML3	Calmodulin-like protein 3 OS=Homo sapiens GN=CALML3 PE=1 SV=2
MAT2A	S-adenosylmethionine synthase isoform type-2 OS=Homo sapiens GN=MAT2A PE=1 SV=1
RPS5	40S ribosomal protein S5 OS=Homo sapiens GN=RPS5 PE=1 SV=4
TMEM33	Transmembrane protein 33 OS=Homo sapiens GN=TMEM33 PE=1 SV=2
LBR	Lamin-B receptor OS=Homo sapiens GN=LBR PE=1 SV=2
SPCS2	Signal peptidase complex subunit 2 OS=Homo sapiens GN=SPCS2 PE=1 SV=3
SF3B4	Splicing factor 3B subunit 4 OS=Homo sapiens GN=SF3B4 PE=1 SV=1
SLC30A7	Zinc transporter 7 OS=Homo sapiens GN=SLC30A7 PE=2 SV=1
SRPK1	SRSF protein kinase 1 OS=Homo sapiens GN=SRPK1 PE=1 SV=2
SDF2	Stromal cell-derived factor 2 OS=Homo sapiens GN=SDF2 PE=1 SV=2
VKORC1	Vitamin K epoxide reductase complex subunit 1 OS=Homo sapiens GN=VKORC1 PE=1 SV=1
TMEM109	Transmembrane protein 109 OS=Homo sapiens GN=TMEM109 PE=1 SV=1
NSFL1C	Isoform 2 of NSFL1 cofactor p47 OS=Homo sapiens GN=NSFL1C
